# Supplementary material for: Jasmonate and Ethylene-Regulated Ethylene Response Factor 22 Promotes Lanolin-Induced Anthocyanin Biosynthesis in ‘Zaosu’ Pear (Pyrus bretschneideri Rehd.) Fruit
Source: MDPI journal article supplement (doi:10.3390/biom10020278), 2020-02-11
Supplement: s1 [file s1]

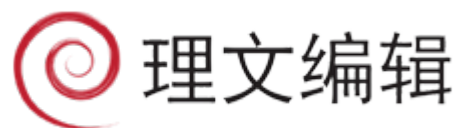

# Certificate of Editing

Edited provisional title  
Jasmonate- and ethylene-regulated ethylene response factor 22  
promotes lanolin-induced anthocyanin biosynthesis in 'Zaosu' pear  
(Pyrus bretschneideri Rehd.) fruit

Client name and institution  
Ting Wu, College of Horticulture, Northwest A&F University, Taicheng Road NO.3, Yangling 712100,  
Shaanxi Province, China

Date Completed  
2020-02-06

Identification code  
75249

Certificate issued by  
Koji Yamashita  
Managing Director and CEO

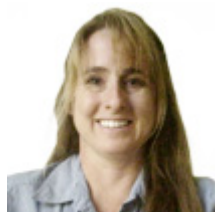

Expert Editor: Lesley Benyon  
1999 PhD Genetics and Molecular  
Biology  
University of North Carolina  
Biochemistry and Cell Biology, Genetics, Plant  
Biology

[www.liwenbianji.cn](http://www.liwenbianji.cn)

While this certificate confirms the authors have used Edanz's editing services, we cannot guarantee that additional changes have not been made after our edits.
